# Supplementary material for: The end of the decline in cervical cancer mortality in Spain: trends across the period 1981–2012
Source: Springer Nature journal article supplement (doi:10.1186/s12885-015-1306-x), 2015-04-14

**FigureS1.** Age-standardised cervical cancer mortality rates in Spain by Autonomous Community (Deaths/100.000 women). European Standard Population

**a) Period 1981-1985**

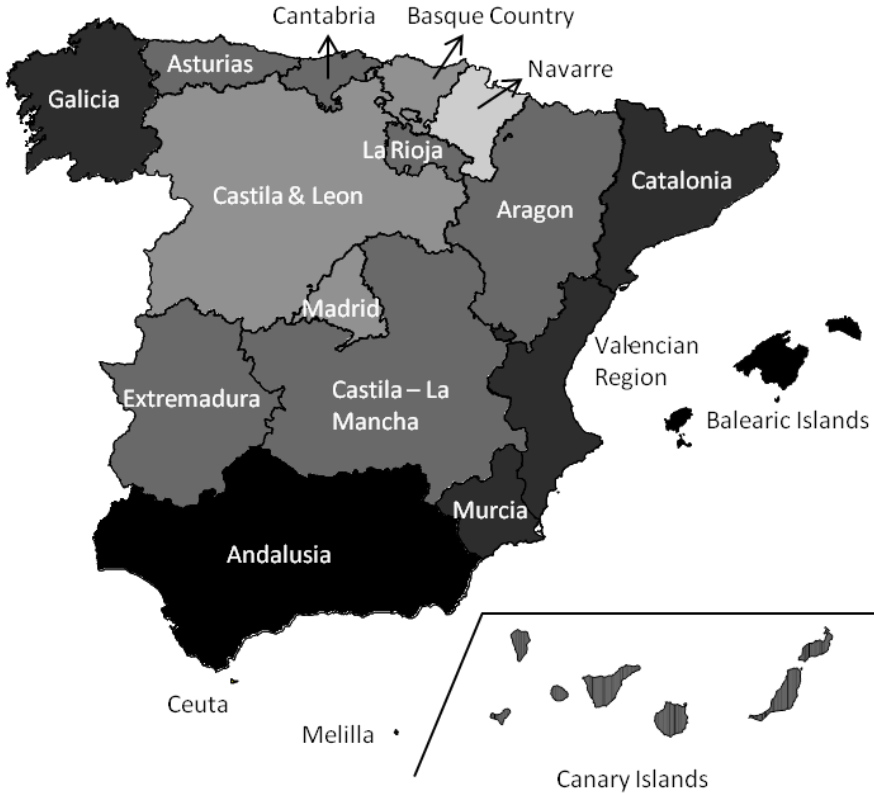

**b) Period 2006-2012**

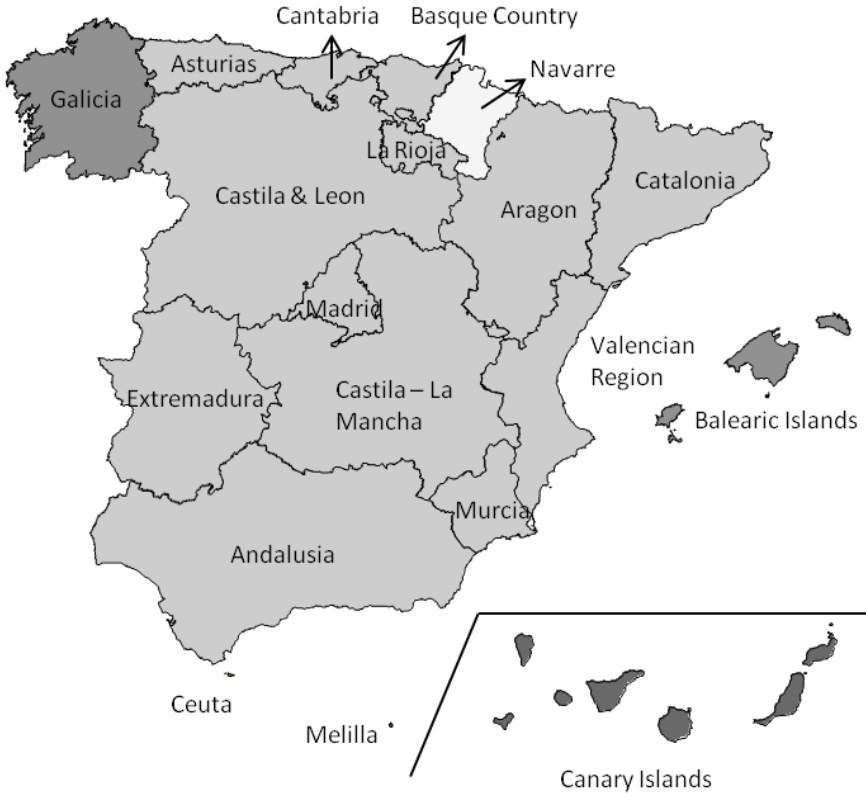

Supplement: MOESM2 [file 9744400]
